# Supplementary material for: Bioinformatics analysis of common differential genes of coronary artery disease and carotid atherosclerosis
Source: Research Square preprint supplement (doi:10.21203/rs.3.rs-273213/v1), 2021-03-05
Supplement: Supplementary file 1 [file 67b9d363a6362f1d0658eb1a.docx]

**Supplementary Table1**: GO and KEGG pathway analysis of GSE100927

| classification | Term | P-Value | Genes |
| --- | --- | --- | --- |
| Biological Process | GO:0006955:immune response | 2.96E-20 | CSF3, ADAMDEC1, IL1RN, GPR65, LST1, NCF4, AQP9, CXCL14, TNF, CTSS, FCGR3A, RGS1, CD36, CCR5, CCR2, HLA-DPA1, IL18, HLA-B, VAV1, TLR1, ZEB1, AIM2, SLPI, OAS1, IL1B, IRF8, LCP2, LTB, HLA-DQB2, TNFRSF21, HLA-DQB1, TLR2, PTGER4, IGSF6, C5AR1, IL2RG, C3, HLA-DMA, HLA-DMB, NFIL3, C7, CCL5, CCL4, CCL3, CCL18, FCGR1B, HLA-DQA2, S1PR4, HLA-DQA1, CCR1, NGFR, CD74, HLA-DRB5, GZMA, LILRB2, CXCL10, IGLL1, HLA-DPB1, HLA-DRA, FCGR2C, HAMP, HLA-DRB1, IL17B, C1QC |
| GO:0006954:inflammatory response | 3.36E-19 | GPR68, ITGB2, ITGAL, LIPA, TNF, PIK3CG, PYCARD, CCRL2, BLNK, C3AR1, AOX1, LGALS9, CCR5, CCR2, HAVCR2, SYK, NFAM1, CD180, IL18, CYBB, CYBA, TLR1, HCK, AIM2, IL1B, CHI3L1, TLR7, ADAM8, TNFRSF21, TLR2, CSF1R, CCL3L3, C5AR1, CXCR4, LY96, AOAH, PTGS1, C3, CCL7, CCL5, CCL4, SPP1, CCL3, S1PR3, CD14, CCL18, CCR1, LYN, NGFR, LY86, NFATC4, P2RX7, CXCL10, VNN1, PLP1, SIGLEC1, FOLR2, IL17D, IL17B |
| GO:0045087:innate immune response | 7.11E-12 | CD84, NCF1, NCF2, TREM2, TREM1, PIK3CG, PYCARD, CLEC5A, TNFAIP8L2, JAK3, HAVCR2, ZNF683, SYK, CD180, HLA-B, MATK, CYBB, CYBA, CLEC4A, TLR1, FGR, TYROBP, AIM2, SLPI, BTK, IRF7, TLR7, TLR2, C1QB, CSF1R, C1QA, UNC93B1, LY96, NOD2, CORO1A, C2, RNF135, CSK, CD14, LYN, SIGLEC15, SRMS, CARD9, LY86, IGLL5, MARCO, VNN1, CD6, IGLL1, PYDC1, C1QC |
| GO:0002504:antigen processing and presentation of peptide or polysaccharide antigen via MHC class II | 1.30E-10 | HLA-DMA, HLA-DRB5, HLA-DMB, HLA-DPB1, HLA-DRA, HLA-DQA2, HLA-DQB2, HLA-DRB1, HLA-DQA1, HLA-DPA1, HLA-DQB1 |
| GO:0002250:adaptive immune response | 1.36E-10 | LILRA6, CD84, UNC93B1, LILRA2, PIK3CG, CTSS, LILRA4, LAMP3, SLAMF7, CSK, JAK3, FCGR1B, PAG1, LAIR1, HAVCR2, ZNF683, LYN, SYK, CRTAM, LILRB1, LILRB2, LILRB3, LILRB4, CLEC4A, CD6, BTK, TNFRSF21 |
| Cellular Component | GO:0005886:plasma membrane | 2.22E-17 | IL1RN, VIPR2, HPSE2, CPNE7, AQP9, MLC1, PKD2L1, IFI30, TBC1D10C, C3AR1, MFSD2A, PAQR5, ACTN2, HLA-B, KCNK17, CACNA2D4, BTC, TIAM1, SFRP1, SPINT1, MAP1B, CD109, BTK, AGTR1, SKAP2, SLC22A3, LPAR1, C3, TRPM2, INPP5D, HMOX1, SLAMF7, APOE, CD14, KCNN4, HLA-DQA2, PAG1, HLA-DQA1, CCR1, LYN, NGFR, MSR1, HLA-DRB5, SIGLEC15, ST14, MCAM, PCDH20, ABCA8, IGF1, MARCO, VNN1, VNN2, LPAR5, FXYD1, ITM2A, MRAP2, HLA-DRB1, ITM2C, RYR2, SIGLEC9, DIRAS1, CTSZ, GPR20, TMEM47, AKAP12, SLC22A18, CLDN23, CD36, CCR5, CD33, HLA-DPA1, CCR2, VAV3, CD53, SYK, NFAM1, GFRA1, VAV1, RHOB, TLR1, VAMP8, GPRC5A, SLC7A7, PLIN4, GAS1, TLR7, SGK1, HCST, HLA-DQB2, DBN1, HLA-DQB1, TLR2, PTGER4, KANK1, SELPLG, CXCR4, KCNA5, ADCY7, GPNMB, FLNC, LDLR, LAIR1, P2RY13, CD74, IL10RA, CARD9, LILRB1, LILRB2, SORBS1, LYVE1, LILRB4, HLA-DPB1, PLP1, SIGLEC1, CD68, RAMP1, SIGLEC7, SLC28A3, CD84, CD83, CSF3R, PLXND1, CD82, PCDH11Y, GPR68, GPR65, PCDH11X, TNF, CXCL16, STK10, RGS5, CDH3, PLAU, RGS1, SLCO2B1, ADORA3, LAMP3, CLEC5A, CCRL2, PALM, IGFLR1, SIRPA, IL11RA, CD300A, DIO2, NPY1R, CYBB, CYBA, TC2N, CLEC4A, CACNB2, TYROBP, ADAM8, CD300C, CLEC4G, ATP6V1A, RTN4R, GNAZ, CSF1R, PARM1, KCNE3, NPR1, HVCN1, C5AR1, NPR3, LY96, DAPP1, GPR84, SEZ6L2, CORO1A, LPP, RASGRP3, DPP4, HCAR3, ADAP2, PACSIN3, LPXN, CD300LF, MYH10, STRA6, RASL10A, ZBTB16, OSBPL3, CRTAM, TRPV2, LY86, PTPRD, PTPRC, BAMBI, CNTN1, HLA-DRA, CNTN3, CNTN4, ITGAM, ITGB2, TREM2, ARRB2, LSP1, ITGAL, ADRA1B, PKD2, TREM1, PIK3CG, SGCE, TMEM100, FCGR3A, CA2, BLNK, ITGAX, ITGB7, GPSM3, ITGA4, RHBDF2, ABCC9, AXIN2, ADRA2C, FGR, ARL4C, ADORA2B, ATP6V1B2, ITGA8, ITGA7, LTB, TNFRSF21, CDH19, CATSPER1, CX3CR1, RALA, CD163L1, NOD2, IL2RG, RASD1, CYTH4, FCHO1, RAB23, S1PR3, CSK, FCGR1B, S1PR4, KCNJ2, KCNJ5, KCNJ8, PDE6G, KCNIP3, PLA2G2A, APOBR, P2RX7, TSPAN15, MARCKS, FCGR2A, P2RX4, KLF9, PIK3AP1, FCGR2C, MYO1G |
| GO:0005887:integral component of plasma membrane | 2.76E-15 | CD84, VIPR2, CD83, CSF3R, PLXND1, CD82, GPR68, GPR65, AQP9, PCDH11X, TNF, MILR1, ANPEP, SLCO2B1, CLEC5A, CCRL2, PALM, C3AR1, SLC26A10, MFSD2A, SCARA5, IL11RA, CD180, NPY1R, HLA-B, CYBB, KCNK17, CLEC4A, CACNB2, TYROBP, AGTR1, ADAM8, CD300C, ATP6V1A, RTN4R, CSF1R, SLC22A3, IGSF6, NPR1, HVCN1, NPR3, C5AR1, LPAR1, GPR84, APCDD1, RASGRP3, TRPM2, HCAR3, TSPAN8, TSPAN7, NCKAP1L, HLA-DQA2, PAG1, HLA-DQA1, CCR1, MSR1, NGFR, ST14, CRTAM, TRPV2, GPR137B, PTPRD, MARCO, PTPRC, FXYD1, HLA-DRA, HLA-DRB1, SIGLEC9, GPR20, ADRA1B, PKD2, SGCE, CD37, CD36, CCR5, CD33, HLA-DPA1, CCR2, CD53, CD52, GPR34, ADRA2C, IL17RD, TLR1, GPRC5A, SLC7A7, NPC1, ADORA2B, TLR7, SLC25A4, TNFRSF21, TLR2, PTGER4, CX3CR1, SELPLG, KCNA5, IL2RG, GPNMB, S1PR3, LDLR, S1PR4, KCNJ2, P2RY13, SLC31A2, NTRK3, LAPTM5, LILRB2, LILRB3, LYVE1, P2RX7, TSPAN15, P2RX4, CD6, EVI2B, RAMP1, SIGLEC7, SLC28A3 |
| GO:0070062:extracellular exosome | 2.62E-11 | FCGBP, ALDH1L1, CD84, IL1RN, CD82, CPNE7, PCDH11X, HP, LIPA, ACTG2, STK10, TUBB3, PLAU, ANPEP, CFL2, COTL1, SIRPA, LGALS9, CD300A, ACTN2, FBXO2, HLA-B, RNASE6, KMO, NPNT, RNASE1, TPST2, PLA2G15, SFRP1, RBP4, SPINT1, SLPI, CRISPLD2, SPARCL1, MXRA5, ATP6V0D2, FTL, ATP6V1A, RTN4R, GNAZ, KLK1, NPR3, FBLN1, HPR, RASAL3, CORO1A, FBLN5, PLD3, C2, DPP4, C3, SCIN, TSPAN8, C7, PSAP, PACSIN3, MYH11, APOD, NCKAP1L, APOE, IGFBP6, CD14, PCK1, MYH10, LYN, HLA-DRB5, ST14, SLC37A2, FUCA1, PTPRD, PTPRC, VNN1, CILP, OGN, CNTN1, HLA-DRA, MAN2B1, ITM2A, HLA-DRB1, LGMN, BEX5, ITM2C, FERMT3, RYR2, ITGAM, ITGB2, CTSZ, LSP1, ITGAL, PKD2, VMO1, FCGR3A, GM2A, CRTAC1, CA2, ACP5, AOX1, ITGB7, PHGDH, CD37, CTSD, CD33, HAVCR2, CTSB, CD53, VAV3, GPX1, MMP7, MYOC, ITGA4, GAA, IL18, GFRA1, HBA2, TMC6, KRT31, DUSP26, MMP9, RHOB, FGR, VAMP8, GPRC5A, NPC1, NPC2, IL1B, ATP6V1B2, CHI3L1, CRYAB, FBP1, SMPDL3A, ANGPTL1, C1QB, CSTB, C1QA, RALA, FGL2, SEMA3B, CXCR4, CAPG, SBSN, PTGS1, SELENBP1, HLA-DMA, RAB23, SPP1, CSK, BID, WASF3, LAIR1, CD74, PLA2G2A, GUCA2B, LYVE1, LILRB4, TSPAN15, IGLL5, MARCKS, DES, P2RX4, FCGR2A, FABP5, IGLL1, APOC2, KRT14, APOC1, C16ORF89, CD248, PTPN6, AGRP, MNDA, PI16, CPVL, GLA, MYO1G, C1QC |
| GO:0042613:MHC class II protein complex | 1.19E-10 | CD74, HLA-DMA, HLA-DRB5, HLA-DMB, HLA-DPB1, HLA-DRA, HLA-DQA2, HLA-DQB2, HLA-DRB1, HLA-DQA1, HLA-DPA1, HLA-DQB1 |
| GO:0009986:cell surface | 4.31E-10 | SRPX, ITGAM, ITGB2, PKD2L1, ITGAL, TNF, PLAU, CLEC5A, ITGAX, ITGB7, CD36, CCR5, ADAMTS9, HAVCR2, HLA-DPA1, TNS1, CD53, MMP7, SCARA5, ITGA4, NFAM1, HLA-B, SFRP1, TYROBP, CD109, ITGA8, ITGA7, ADAM8, CRYAB, HCST, TLR2, RTN4R, CSF1R, RALA, C5AR1, LPAR1, CXCR4, NOD2, DPP4, HLA-DMA, LDLR, NGFR, CD74, TRPV2, LAYN, LILRB2, TSPAN15, PTPRC, HLA-DPB1, HLA-DRA, FOLR2, RAMP1, HLA-DRB1, FERMT2 |
| Molecular Function | GO:0032395:MHC class II receptor activity | 2.21E-08 | HLA-DMA, HLA-DPB1, HLA-DRA, HLA-DQA2, HLA-DQB2, HLA-DRB1, HLA-DQA1, HLA-DPA1, HLA-DQB1 |
| GO:0008307:structural constituent of muscle | 3.38E-07 | MYOM1, SYNM, SMTN, PDLIM3, ACTN2, TPM2, MYL2, MYBPH, NEXN, TCAP, MYH11, MYL9 |
| GO:0004872:receptor activity | 9.03E-07 | RTN4R, CSF3R, ITGB2, TREM2, LILRA2, TREM1, ANPEP, ITGAX, ITGB7, LDLR, CD33, STRA6, NGFR, IL10RA, CD180, CRTAM, LILRB2, LILRB3, LYVE1, LILRB4, TLR1, NPC1, TLR7, RAMP1, SIGLEC7, TLR2 |
| GO:0005102:receptor binding | 2.14E-06 | SELPLG, GRP, NXPH3, KCNA5, ARRB2, PKD2, DPP4, C3, NTF3, CSK, IGFBP6, JAK3, IGFBP1, LYN, SRMS, CRTAM, HLA-B, MATK, GFRA1, PTPRD, P2RX7, CXCL10, HCK, TYROBP, P2RX4, BTK, AGRP, PGR, LTB, HAMP, GLA, HCST, ACOT4, ANGPTL1 |
| GO:0003779:actin binding | 2.53E-05 | TAGLN, FKBP15, SYNPO2, LMOD1, CXCR4, CAPG, LSP1, NOD2, CORO1A, CNN1, SCIN, MYO18B, COTL1, TNNI2, CCR5, MYOZ2, MYH10, WASF3, TNS1, GAS2L3, TPM2, SORBS1, SMTN, TNNT3, DBN1, MYO1F, MYO1G |
| KEGG_PATHWAY | hsa05150:Staphylococcus aureus infection | 1.11E-16 | C1QB, C1QA, HLA-DRB5, ITGAM, SELPLG, ITGB2, C5AR1, ITGAL, C2, C3, HLA-DMA, FCGR3A, FCGR2A, HLA-DMB, HLA-DPB1, C3AR1, HLA-DRA, HLA-DQA2, FCGR2C, HLA-DQA1, HLA-DRB1, HLA-DPA1, C1QC, HLA-DQB1 |
| hsa05140:Leishmaniasis | 1.18E-15 | ITGAM, NCF1, NCF2, NCF4, ITGB2, TNF, C3, HLA-DMA, FCGR3A, HLA-DMB, HLA-DQA2, HLA-DQA1, HLA-DPA1, HLA-DRB5, ITGA4, CYBA, MAPK13, FCGR2A, IL1B, HLA-DPB1, HLA-DRA, PTPN6, FCGR2C, HLA-DRB1, HLA-DQB1, TLR2 |
| hsa05152:Tuberculosis | 7.70E-13 | ITGAM, ITGB2, LSP1, NOD2, CORO1A, TNF, CTSS, C3, CYP27B1, HLA-DMA, FCGR3A, HLA-DMB, ITGAX, CD14, BID, CTSD, HLA-DQA2, HLA-DQA1, HLA-DPA1, CD74, HLA-DRB5, SYK, IL10RA, CARD9, IL18, MAPK13, TLR1, FCGR2A, IL1B, HLA-DPB1, HLA-DRA, FCGR2C, ATP6V0D2, HLA-DRB1, HLA-DQB1, TLR2 |
| hsa04145:Phagosome | 8.94E-13 | ATP6V1A, ITGAM, NCF1, NCF2, NCF4, ITGB2, CORO1A, CTSS, C3, HLA-DMA, FCGR3A, HLA-DMB, TUBB3, CD14, CD36, HLA-DQA2, HLA-DQA1, HLA-DPA1, MSR1, HLA-DRB5, HLA-B, CYBA, MARCO, FCGR2A, ATP6V1B2, HLA-DPB1, HLA-DRA, RAB7B, FCGR2C, ATP6V0D2, HLA-DRB1, HLA-DQB1, TLR2 |
| hsa05323:Rheumatoid arthritis | 2.65E-12 | ATP6V1A, CCL3L3, ITGB2, ITGAL, TNF, HLA-DMA, HLA-DMB, CCL5, CCL3, ACP5, HLA-DQA2, HLA-DQA1, HLA-DPA1, HLA-DRB5, MMP1, IL18, IL1B, ATP6V1B2, HLA-DPB1, HLA-DRA, LTB, ATP6V0D2, HLA-DRB1, HLA-DQB1, TLR2 |

**Supplementary Table2:** GO and KEGG pathway analysis of GSE56885.

| classification | Term | P-Value | Genes |
| --- | --- | --- | --- |
| Biological Process | GO:0006954:inflammatory response | 1.19E-07 | CEBPB, CXCL8, RIPK2, CD180, C5AR1, CXCR4, TNFAIP3, CXCL1, PTGS2, CXCL2, BCL6, IL1B, NFKBIZ, CCL3, OLR1, NLRP3, CCR5, CCR2 |
| GO:0006935:chemotaxis | 2.39E-06 | CXCL8, C5AR1, PLAUR, CCR9, CCL3, CXCR4, CXCL1, CCR5, CXCL2, CCR2 |
| GO:0070098:chemokine-mediated signaling pathway | 4.78E-06 | CXCL8, CCR9, CCL3, CXCR4, CXCL1, CCR5, CXCL2, CCR2 |
| GO:0032743:positive regulation of interleukin-2 production | 7.20E-06 | CD83, RIPK2, PDE4D, PDE4B, CCR2 |
| GO:0006955:immune response | 1.15E-05 | HLA-DRB5, CEBPB, CXCL8, TNFSF14, C5AR1, CXCL1, CXCL2, NFIL3, CD8B, RGS1, IL1B, FTH1, CCL3, CCR9, CCR5, CCR2 |
| GO:0071222:cellular response to lipopolysaccharide | 1.19E-05 | ZFP36, CEBPB, CXCL8, PDE4D, CD180, PDE4B, NLRP3, TNFAIP3, CCR5 |
| GO:0030593:neutrophil chemotaxis | 3.73E-05 | CXCL8, IL1B, PDE4D, C5AR1, PDE4B, CCL3, TREM1 |
| Cellular Component | GO:0005737:cytoplasm | 3.59E-05 | ZNF174, TNFAIP3, KIF11, PRDM1, BZW1, CDC20, EPB41L4A, RGS2, ZFP36, FTH1, NAMPT, ENC1, STMN1, GRB10, PIM3, OIP5, TNFAIP8L2, MLYCD, CCR5, DLGAP5, PSPH, CCR2, DACT1, SERPINB2, CISH, DDX58, DUSP1, RIPK2, SLC30A1, GAB2, RAD23B, ADRA2A, ASPM, TMSB15A, DDIT4, TRIM13, SPOPL, GEMIN6, SGK1, TRIB1, EXD2, CEBPB, CXCR4, TYMS, PTGS2, RAD54B, DNAJB1, CCNB1, SOCS1, FGD6, XRRA1, CCL3, STK38L, NLRP3, BUB1, CBR3, FDXACB1, PLK3, EGR2, RRM2, TNFSF14, BCDIN3D, NSG1, ANKHD1, NFKBIA, NR4A2, POMC, PER1, NR4A1, UBE2T, RLIM, ID3, S100P, CDKN3 |
| GO:0005634:nucleus | 2.37E-04 | C2ORF42, ZNF174, TNFAIP3, PRDM1, CDC20, RGS2, ZFP36, FTH1, ENC1, NFKBIZ, OIP5, DLGAP5, DACT1, IER3, ZNF200, DUSP2, DUSP1, USP44, RAD23B, ASPM, SPOPL, GEMIN6, ZNF780A, SGK1, TRIB1, EXD2, CEBPB, UHRF1, TACSTD2, ZNF2, TYMS, PTGS2, AURKA, RAD54B, PURB, DNAJB1, CCNB2, CCNB1, SOCS1, YBEY, NFIL3, NACC2, TCEAL2, XRRA1, NLRP3, PMAIP1, ZNF267, PLK3, JUN, EGR2, RRM2, TIPARP, BCDIN3D, NSG1, FOSL2, NFKBIA, NR4A2, PER1, NR4A1, NR4A3, MAFB, ZNF816, BCL6, UBE2T, ID1, RLIM, ID3, S100P, CENPBD1, MXD1, FAM50B, ZNF212, CDKN3 |
| GO:0005829:cytosol | 0.004103 | BTG2, PFKFB3, TACSTD2, TNFAIP3, IRS2, KIF11, TYMS, AURKA, CDC20, DNAJB1, CCNB2, RGS2, ZFP36, CCNB1, SOCS1, RGS1, FTH1, STMN1, NAMPT, GRB10, CCL3, PDE4B, NLRP3, PMAIP1, BUB1, PSPH, CCR2, DACT1, IER3, CBR3, JUN, RRM2, CISH, DDX58, RIPK2, PDE4D, GAB2, NFKBIA, RABIF, RPL27A, IL1B, DDIT4, RLIM, GEMIN6, SGK1, KBTBD7 |
| Molecular Function | GO:0005515:protein binding | 8.86E-06 | SIRPG, IRS2, KLHL35, PRDM1, GIMAP7, CDC20, RGS2, ZFP36, CNST, SIT1, FTH1, STMN1, NAMPT, GRB10, OIP5, PIM3, MTPAP, JUNB, IER3, COG7, CISH, SLC30A1, KCTD6, CD8B, TRIM13, GEMIN6, TRIB1, CBLL1, EXD2, TACSTD2, CCNB2, CCNB1, SOCS1, NACC2, NLRP3, STK38L, PMAIP1, PAG1, ZNF420, PLK3, JUN, EGR2, TNFSF14, BCDIN3D, NSG1, ANKHD1, FOSL2, NR4A2, NFKBIA, NR4A1, NR4A3, MAFB, BCL6, RPL27A, ID1, ID3, MXD1, C2ORF42, BTG2, CXCL8, TNFAIP3, CXCL2, ENC1, NFKBIZ, OLR1, TNFAIP8L2, CCR5, DLGAP5, CEP55, DACT1, DUSP2, DDX58, DUSP1, RIPK2, PDE4D, USP44, PLAUR, CCDC117, GAB2, RAD23B, RAB33A, ADRA2A, CKS2, SPOPL, SGK1, CEBPB, BCL2A1, UHRF1, CXCR4, PTGS2, HSPA13, AURKA, RAD54B, DNAJB1, ASTE1, NFIL3, CCL3, BUB1, FDXACB1, RRM2, G0S2, GTF2H1, TTC9C, RABIF, KBTBD6, MFAP1, S100P, FAM98A, KBTBD7, ZNF212, FAM50B, CDKN3 |
| GO:0008134:transcription factor binding | 4.04E-04 | PURB, NFKBIA, PER1, CEBPB, JUN, MAFB, ID1, NLRP3, ID3, TRIB1, JUNB |
| GO:0042803:protein homodimerization activity | 0.001671 | JUN, CEBPB, ZNF174, BCL2A1, RIPK2, TYMS, PTGS2, GIMAP7, ADRA2A, NR4A2, NR4A3, NACC2, ID1, NAMPT, MTPAP, PSPH, CCR2 |
| GO:0000978:RNA polymerase II core promoter proximal region sequence-specific DNA binding | 0.002188 | PER1, EGR2, CEBPB, JUN, NR4A3, MAFB, NACC2, PRDM1, MXD1, JUNB, FOSL2 |
| GO:0035259:glucocorticoid receptor binding | 0.004699 | NR4A2, CEBPB, NR4A3 |
| KEGG_PATHWAY | hsa04621:NOD-like receptor signaling pathway | 3.23E-06 | NFKBIA, CXCL8, RIPK2, IL1B, NLRP3, TNFAIP3, CXCL1, CXCL2 |
| hsa04668:TNF signaling pathway | 3.02E-05 | NFKBIA, CEBPB, JUN, IL1B, TNFAIP3, CXCL1, PTGS2, CXCL2, JUNB |
| hsa04064:NF-kappa B signaling pathway | 6.10E-05 | NFKBIA, CXCL8, TNFSF14, BCL2A1, DDX58, IL1B, TNFAIP3, PTGS2 |
| hsa04380:Osteoclast differentiation | 7.74E-04 | NFKBIA, JUN, SOCS1, IL1B, SIRPG, GAB2, JUNB, FOSL2 |
| hsa04062:Chemokine signaling pathway | 0.00135 | NFKBIA, CXCL8, CCR9, CCL3, CXCR4, CXCL1, CCR5, CXCL2, CCR2 |
